# Supplementary material
Source: publisher figshare collection journal article supplement (https://acs.figshare.com/ndownloader/files/3823885)
Supplement: Supplementary file 1 [file 3823885]

# Metabolomic Analysis of Human Fecal Microbiota: A Comparison of Feces-Derived Communities and Defined Mixed Communities

## Supporting Information

*Sandi Yen<sup>†</sup>, Julie A. K. McDonald<sup>‡</sup>, Kathleen Schroeter<sup>‡</sup>, Kaitlyn Oliphant<sup>‡</sup>, Stanislav Sokolenko<sup>†</sup>, Eric J. M. Blondeel<sup>†</sup>, Emma Allen-Vercoe<sup>‡\*</sup>, Marc G. Aucoin<sup>†\*</sup>*

<sup>†</sup>Waterloo Institute for Nanotechnology, Department of Chemical Engineering, University of

Waterloo,

Waterloo, Ontario, Canada, N2L 3G1

<sup>‡</sup>Department of Molecular and Cellular Biology, University of Guelph, Guelph, Ontario,

Canada, N1G 2W1

This document provides extra information concerning the choice of compound groupings based on concentrations (Figure S1); and loading plot associated with PCA of samples (Figure S2).

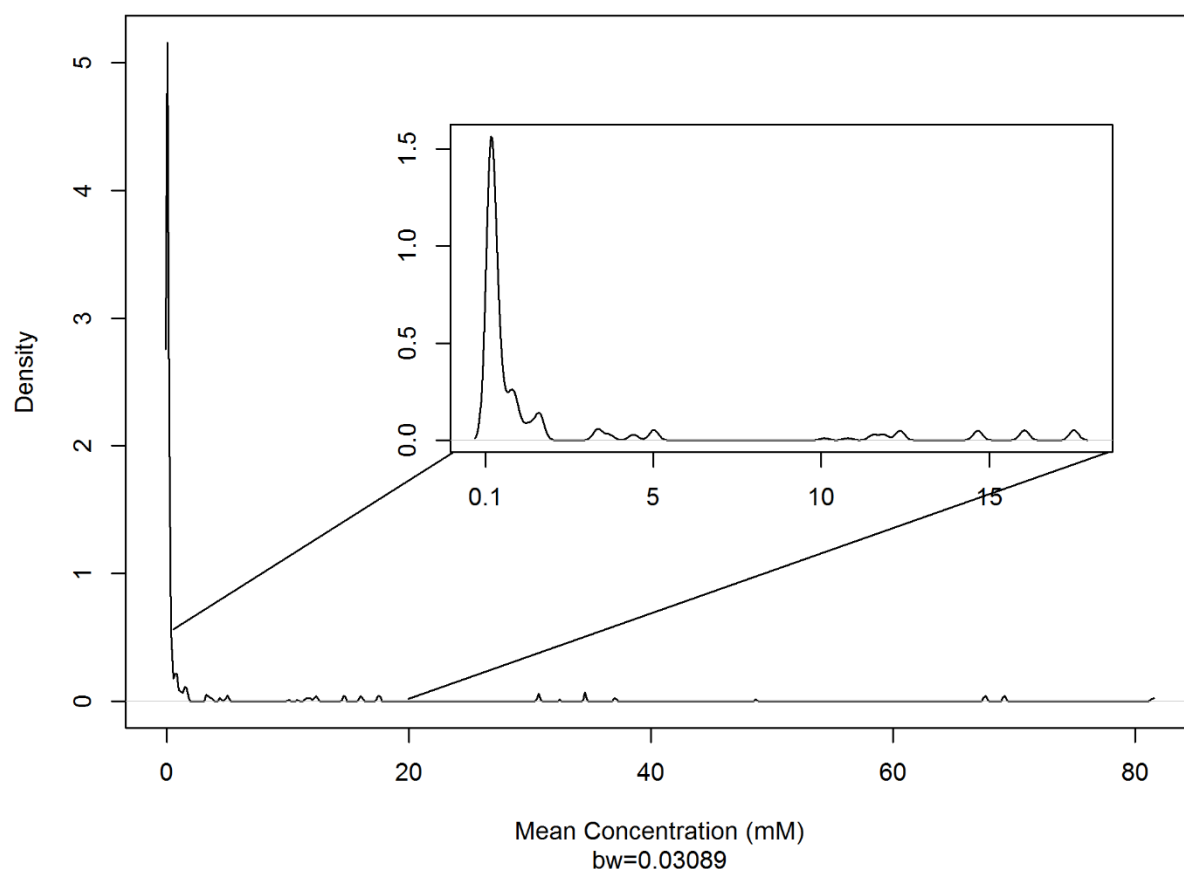

**Figure S1.** Kernel density plot of mean concentrations of untreated samples collected during steady state, bandwidth=0.03043. Inset is the kernel density plot of mean concentrations greater than or equal to 0.1 mM and less than or equal to 20 mM, bandwidth = 0.135. The clusters observed in these plots were used to define the bin in which the compounds would be grouped.

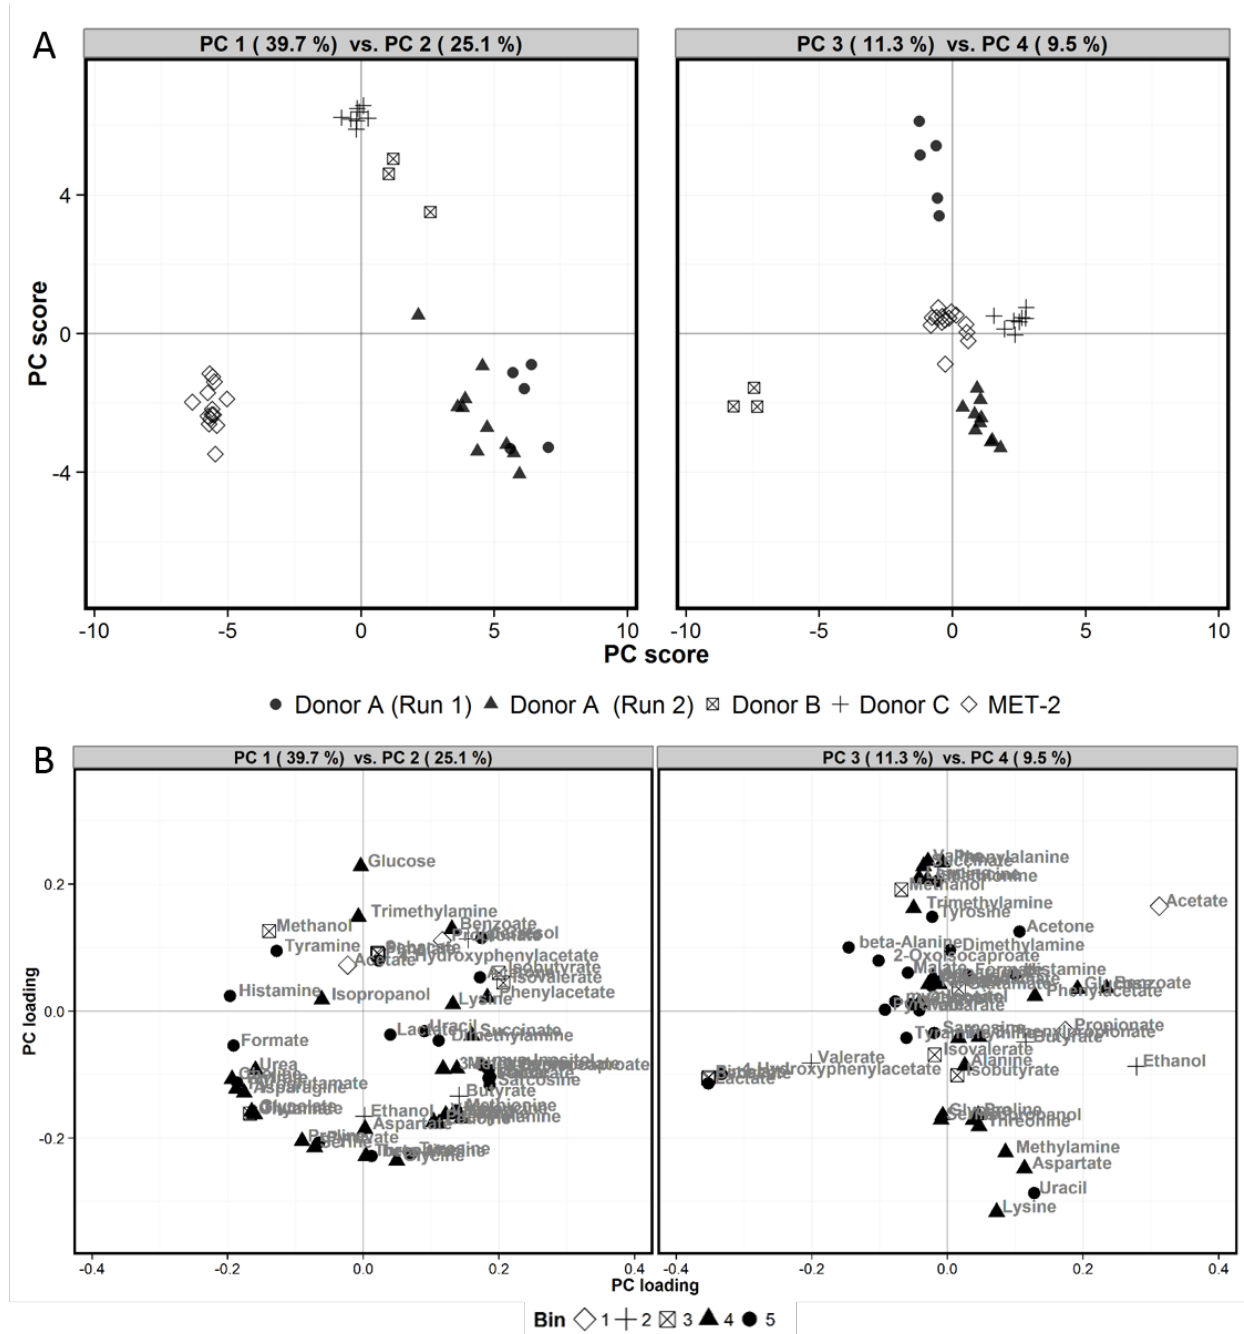

**Figure S2.** (A) PCA Score plot of metabolite profiles of donor A, B, C and MET-2 cultures. (B) PCA loading plot of metabolite profiles of donor A, B C and MET-2 cultures. Data is mean centered and scaled by unit variance. Bin 1: mean  $\geq 20$  mM; Bin 2:  $10 \leq \text{mean} < 20$  mM; Bin 3:  $1 \leq \text{mean} < 10$  mM; Bin 4:  $0.1 \leq \text{mean} < 1$  mM; Bin 5:  $0 \leq \text{mean} < 0.1$  mM
